# Supplementary material for: Comparing Cognitive Tests and Smartphone‐Based Assessment in 2 US Community‐Based Cohorts
Source: PubMed Central journal article supplement — J Am Heart Assoc. 2024 Jan 16;13(2):e032733. doi: 10.1161/JAHA.123.032733 (PMC10926794; doi:10.1161/jaha.123.032733), 2024-01-16
Supplement: JAH3-13-e032733-s001.pdf [file JAH3-13-e032733-s001.pdf]

# **Supplemental Material**

**Table S1. Dana task scores by GCS group among Framingham Heart Study participant.**

| <b>N= 406</b>                           | <b>Total</b>     | <b>GCS 1</b>     | <b>GCS 2</b>     | <b>GCS 3</b>     |
|-----------------------------------------|------------------|------------------|------------------|------------------|
| <b>Dana Task - Code Substitution</b>    |                  |                  |                  |                  |
| avg_responsetime_cs                     | 1923.29 (394.85) | 2134.55 (456.20) | 1911.42 (362.86) | 1733.81 (270.49) |
| meanrtcorrect_cs                        | 1894.59 (370.06) | 2049.21 (424.94) | 1900.63 (353.17) | 1726.32 (259.34) |
| meanthru_cs                             | 31.31 (6.66)     | 27.94 (7.21)     | 31.53 (6.27)     | 34.26 (5.25)     |
| meanrt_cs                               | 1913.43 (392.78) | 2095.30 (466.05) | 1911.42 (362.84) | 1733.79 (270.47) |
| <b>Dana Task - Go No Go</b>             |                  |                  |                  |                  |
| avg_responsetime_gng                    | 866.77 (133.90)  | 895.10 (178.60)  | 868.41 (117.73)  | 834.88 (102.75)  |
| meanrtcorrect_gng                       | 614.61 (146.47)  | 621.06 (181.16)  | 623.25 (141.57)  | 590.75 (111.72)  |
| meanthru_gng                            | 96.95 (23.21)    | 90.36 (28.53)    | 96.96 (21.21)    | 103.10 (19.21)   |
| meanrt_gng                              | 849.14 (151.22)  | 852.84 (211.99)  | 854.38 (134.24)  | 834.88 (102.68)  |
| <b>Dana Task - Simple Reaction Time</b> |                  |                  |                  |                  |
| avg_responsetime_srt                    | 363.83 (71.17)   | 392.07 (94.96)   | 358.57 (61.75)   | 345.90 (50.12)   |
| meanrtcorrect_srt                       | 359.67 (65.23)   | 379.97 (83.66)   | 356.90 (59.39)   | 344.71 (48.80)   |
| meanthru_srt                            | 168.95 (29.50)   | 158.05 (34.27)   | 171.15 (27.85)   | 175.51 (24.44)   |
| meanrt_srt                              | 361.59 (68.39)   | 383.26 (88.95)   | 358.53 (61.72)   | 345.87 (50.08)   |

Data are presented as mean (SD)

**Table S2. Dana task scores by GCS group among Bogalusa Heart Study participants.**

| <b>Dana task - Code Substitution</b>    |                  |                   |                  |                  |
|-----------------------------------------|------------------|-------------------|------------------|------------------|
| avg_responsetime_cs                     | 1863.13 (389.68) | 2060.724 (371.78) | 1803.01 (376.10) | 1775.97 (388.59) |
| meanrtcorrect_cs                        | 1846.36 (363.02) | 2031.4 (364.69)   | 1788.83 (337.98) | 1767.29 (367.35) |
| meanthru_cs                             | 32.02 (6.98)     | 28.07 (6.12)      | 32.90 (6.21)     | 34.43 (8.01)     |
| meanrt_cs                               | 1863.05 (389.71) | 2060.73 (371.92)  | 1802.93 (376.05) | 1775.79 (388.62) |
| <b>Dana task - Go No Go. (n=55)</b>     |                  |                   |                  |                  |
| avg_responsetime_gng                    | 841.07 (94.21)   | 882.18287 (96.98) | 828.53 (89.93)   | 824.14 (93.97)   |
| meanrtcorrect_gng                       | 606.25 (118.88)  | 655.36 (130.95)   | 592.04 (116.19)  | 584.57 (105.04)  |
| meanthru_gng                            | 101.31 (17.25)   | 93.57 (16.82)     | 103.74 (16.35)   | 104.36 (18.21)   |
| meanrt_gng                              | 841.05 (94.23)   | 882.21 (96.97)    | 828.56 (89.99)   | 824 (93.89)      |
| <b>Dana task - Simple Reaction Time</b> |                  |                   |                  |                  |
| avg_responsetime_srt                    | 358.12 (111.09)  | 353.27 (100.44)   | 366.07 (128.53)  | 345.97 (83.24)   |
| meanrtcorrect_srt                       | 336.53 (83.40)   | 339.87 (66.36)    | 330.79 (94.80)   | 345.46 (78.56)   |
| meanthru_srt                            | 174.89 (42.22)   | 177.53 (40.63)    | 171.83 (45.02)   | 178.69 (40.19)   |
| meanrt_srt                              | 342.33 (95.59)   | 353.4 (100.53)    | 335.03 (100.64)  | 345.85 (83.21)   |

presented as mean (SD)

Data  
are

**Table S3. Association between DANA digital scores and GCS z-score adjusting for educational attainment.**

|                                         | <b>FHS (n=309)</b> |                  | <b>BHS (n=58)</b> |              |
|-----------------------------------------|--------------------|------------------|-------------------|--------------|
|                                         | B ± SE             | p-value          | B ± SE            | p-value      |
| <b>Dana task - Code Substitution</b>    |                    |                  |                   |              |
| avg_responsetime_cs                     | -.001 (.0001)      | <b>&lt;0.001</b> | -.0002 (.0001)    | <b>0.026</b> |
| meanrtcorrect_cs                        | -.001 (.0001)      | <b>&lt;0.001</b> | -.0002 (.0001)    | <b>0.021</b> |
| meanthru_cs                             | .03 (.004)         | <b>&lt;0.001</b> | .01 (.01)         | <b>0.025</b> |
| meanrt_cs                               | -.001 (.0001)      | <b>&lt;0.001</b> | -.0002 (.001)     | <b>0.026</b> |
| <b>Dana task - Go No Go.</b>            |                    |                  |                   |              |
| avg_responsetime_gng                    | -.001 .0002        | <b>0.006</b>     | -.001 (.0004)     | <b>0.044</b> |
| meanrtcorrect_gng                       | -.001 .0002        | <b>0.004</b>     | -.001 (.0003)     | <b>0.026</b> |
| meanthru_gng                            | .01 .001           | <b>&lt;0.001</b> | .01 (.002)        | <b>0.025</b> |
| meanrt_gng                              | -.0004 .0002       | 0.057            | -.001 (.0004)     | <b>0.044</b> |
| <b>Dana task - Simple Reaction Time</b> |                    |                  |                   |              |
| avg_responsetime_srt                    | -.001 (.0004)      | <b>0.001</b>     | -.0003 (.0003)    | 0.333        |
| meanrtcorrect_srt                       | -.001 (.0004)      | <b>0.001</b>     | -.0003 (.0005)    | 0.512        |
| meanthru_srt                            | .003 (.001)        | <b>0.003</b>     | .001 (.001)       | 0.282        |
| meanrt_srt                              | -.001 (.0004)      | <b>0.001</b>     | -.001 (.0004)     | 0.194        |

**B:** unstandardized coefficients, **SE:** standard errors and p-values are included for the association between the DANA measure and GCS adjusted for age and educational attainment proxy (WRAT 3 for FHS, and WRAT 4 for BHS).

**Figure S1. Flowchart of study sample for FHS participants.**

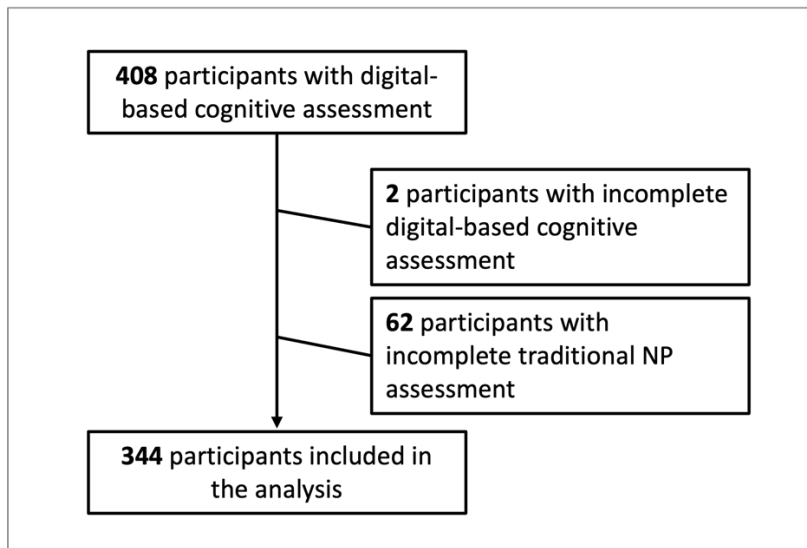

No significant differences were found in sex ( $p=0.36$ ), age ( $p=0.37$ ) or race( $p=0.70$ )

**Figure S2. Flowchart of study sample for BHS participants.**

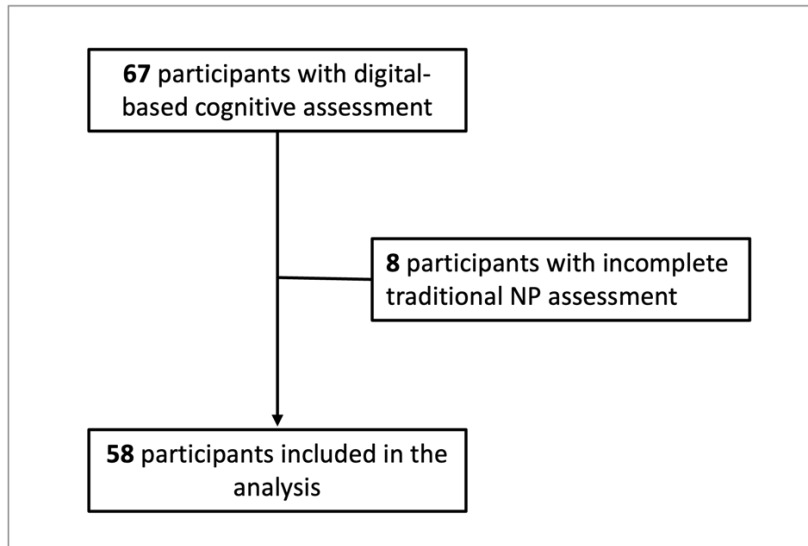

No significant differences were found in sex ( $p=0.66$ ) and age ( $p=0.09$ ), but significant differences in race were found ( $p=0.01$ ). From the excluded participants, 2 self-reported as White, 3 as Black, and 3 more did not have data available.
